# Supplementary material
Source: publisher site journal article supplement (https://www.spandidos-publications.com/3161/downloadSupplementary)

Figure S1. Transfection efficiency of miR-186-3p inhibitor and si-MCM2 in HeLa and SiHa cells. (A) Transfection efficiency of miR-186-3p inhibitor and si-MCM2 in HeLa and SiHa cells was assessed by reverse transcription-quantitative PCR. (B) Transfection efficiency of miR-186-3p inhibitor and si-MCM2 in HeLa and SiHa cells was assessed by western blotting. All bands for a cell line were from the same gels (different gels were used for the different cell lines). \*\*P<0.001 vs. CON group (one-way ANOVA with Tukey's post hoc test). ##P<0.001 vs. inhibitor+si group (one-way ANOVA with Tukey's post hoc test). co-NC, co-transfection of inhibitor-NC and si-NC; CON, blank control; inhibitor, miR-186-3p inhibitor; inhibitor-NC, negative control of miR-186-3p inhibitor; inhibitor+si, co-transfection of miR-186-3p inhibitor and si-MCM2; MCM2, minichromosome maintenance complex component 2; miR-186-3p, microRNA-186-3p; si, small interfering RNA; si-NC, negative control of si-MCM2.

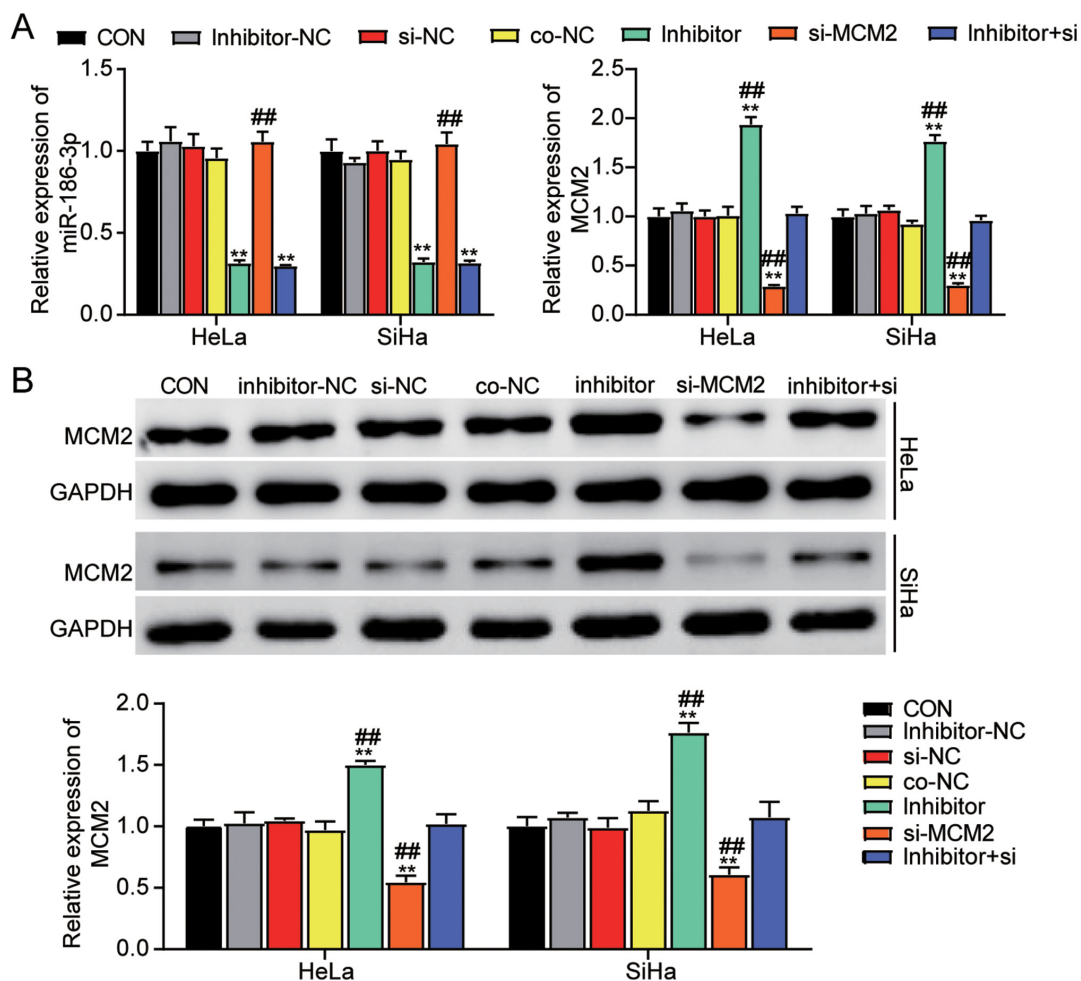

Supplement: Supplementary file 1 [file downloadSupplementary]
